# Supplementary material for: Semen Modulates the Expression of NGF, ABHD2, VCAN, and CTEN in the Reproductive Tract of Female Rabbits
Source: MDPI journal article supplement (doi:10.3390/genes11070758), 2020-07-07
Supplement: s1 [file s1]

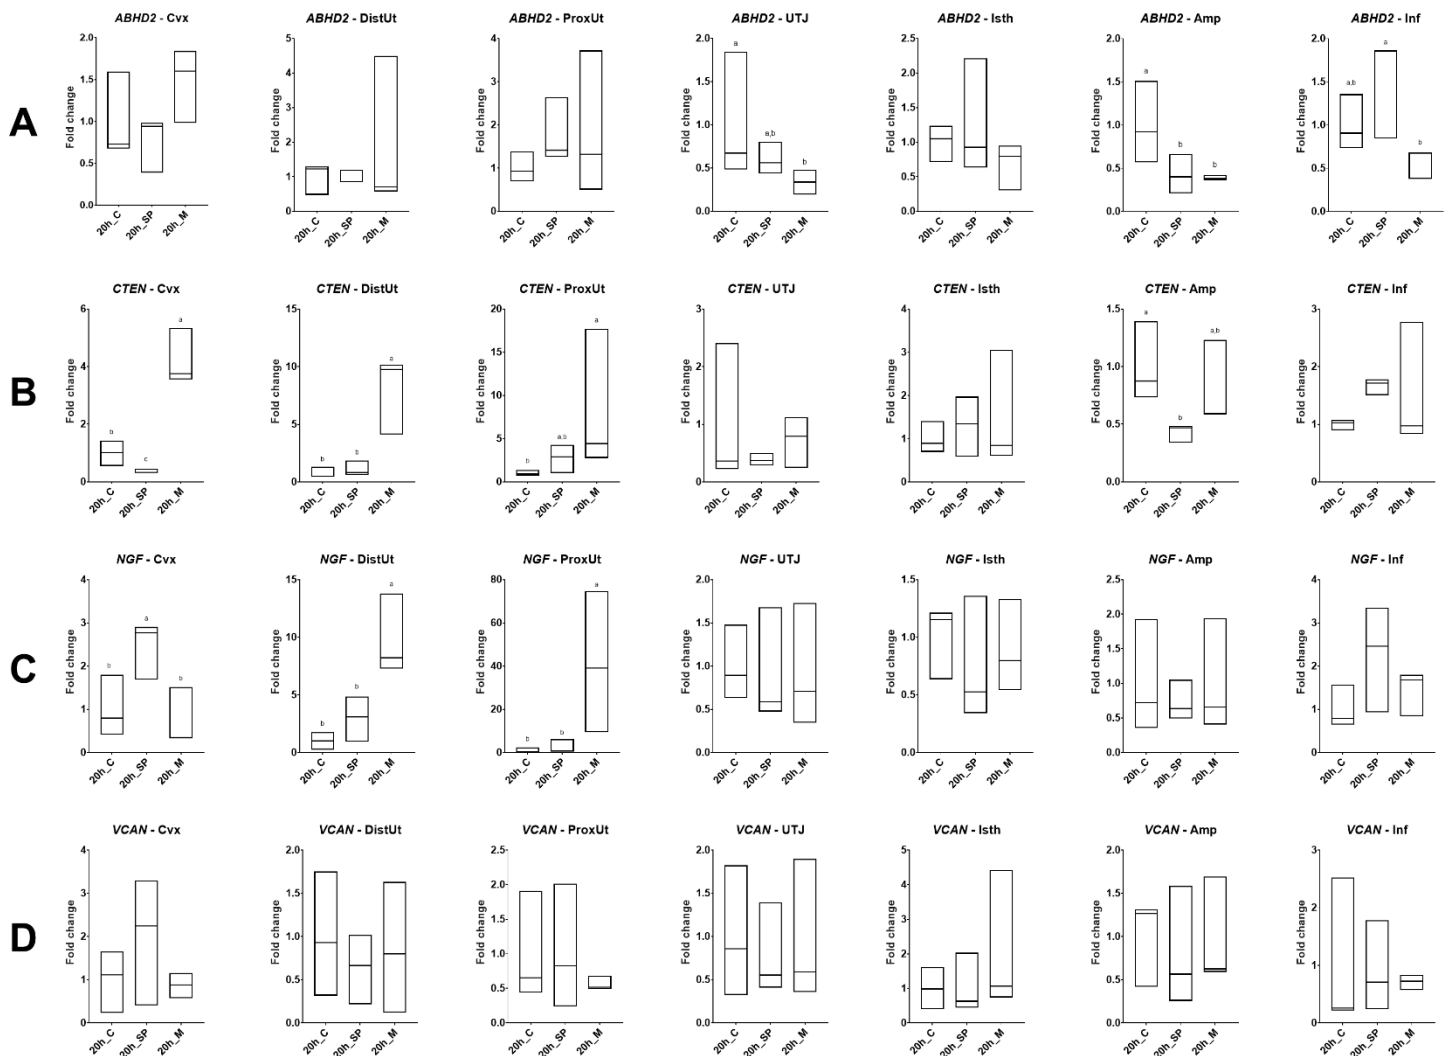

2 **Figure S1.** Changes in **A) ABHD2**, **B) CTEN**, **C) NGF** and **D) VCAN** expression among different  
3 treatments at 20 h post-treatment: 20 h post-induction of the ovulation, control (20 h\_C); 20 h post-  
4 seminal plasma infusion, 20 h\_SP; and 20 h post-natural mating, 20 h\_NM. Tissue anatomical regions  
5 of the rabbit female reproductive tract (endocervix, Cvx; distal uterus, DistUt; proximal uterus,  
6 ProxUt; utero-tubal junction, UTJ; distal isthmus, Isth; ampulla, Amp; and infundibulum, Inf). Fold  
7 changes relative to reference group (20 h\_C) are shown. Different letters (<sup>a,b</sup>) represent statistical  
8 differences between tissues ( $p < 0.05$ ). Median [minimum, maximum].

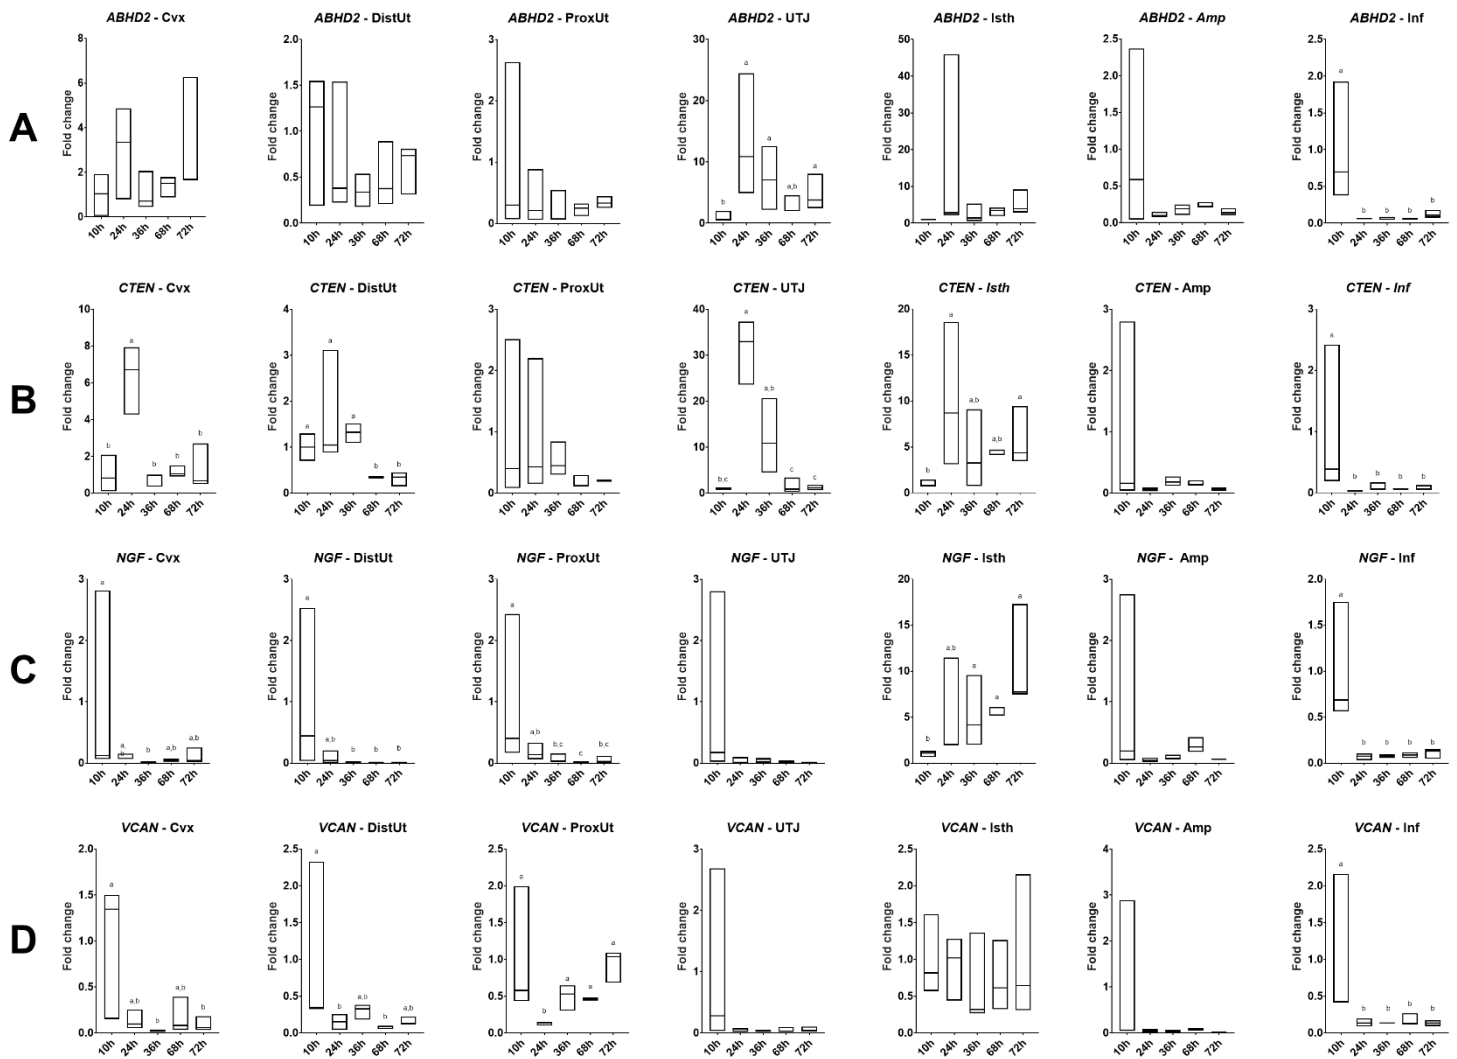

10 **Figure S2.** Changes in **A) ABHD2**, **B) CTEN**, **C) NGF**, and **D) VCAN** expression among different times  
 11 (from 10 to 72 h) post-mating: 10, 24, 36, 68, and 72 h post-natural mating. Tissue anatomical regions  
 12 of the rabbit female reproductive tract (endocervix, Cvx; distal uterus, DistUt; proximal uterus,  
 13 ProxUt; utero-tubal junction, UTJ; distal isthmus, Istth; ampulla, Amp; and infundibulum, Inf). Fold  
 14 changes relative to reference group (10 h post-mating) are shown. Different letters (<sup>a,b,c</sup>) represent  
 15 statistical differences between tissues ( $p < 0.05$ ). Median [minimum, maximum].

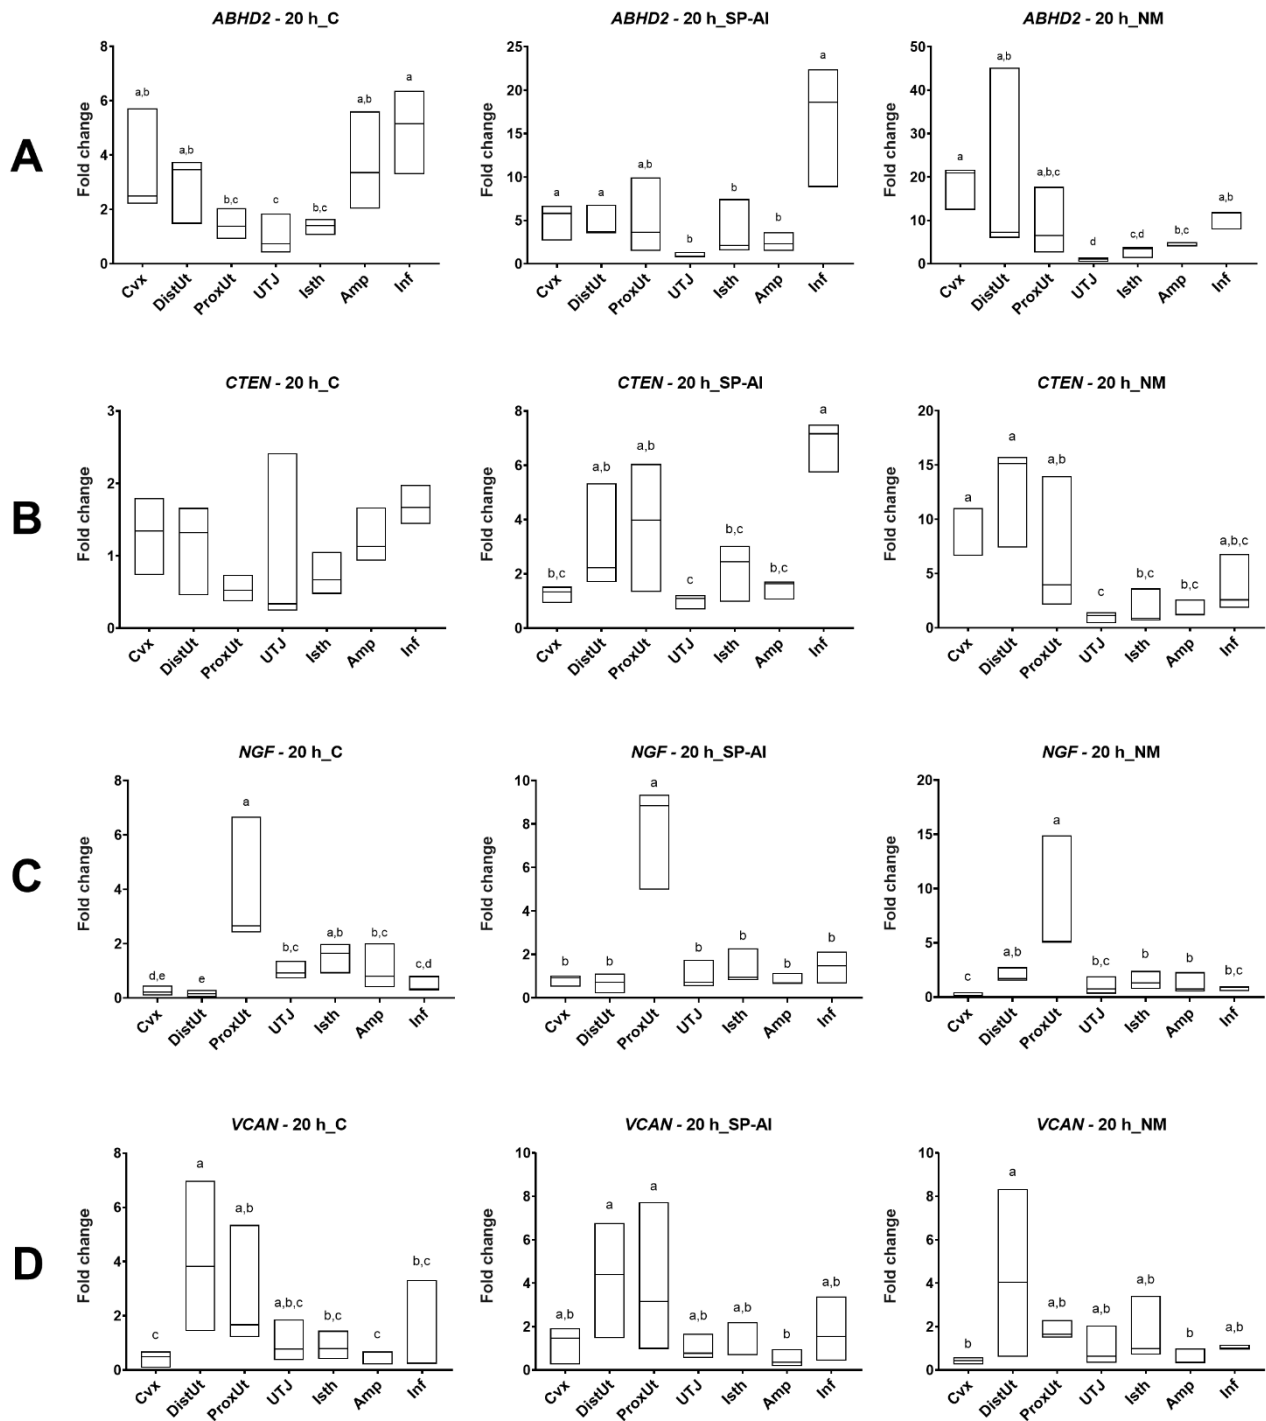

17 **Figure S3.** Changes in A) *ABHD2*, B) *CTEN*, C) *NGF*, and D) *VCAN* expression among different tissues  
 18 at 20 h post-treatment. 20 h post-induction of the ovulation, control (20 h\_C); 20 h post-seminal plasma  
 19 infusion, 20 h\_SP; and 20 h post-natural mating, 20 h\_NM. Tissue anatomical regions of the rabbit  
 20 female reproductive tract (endocervix, Cvx; distal uterus, DistUt; proximal uterus, ProxUt; utero-  
 21 tubal junction, UTJ; distal isthmus, Isth; ampulla, Amp; and infundibulum, Inf). Fold changes relative  
 22 to reference group (UTJ) are shown. Different letters (<sup>a,b,c,d</sup>) represent statistical differences between  
 23 tissues ( $p < 0.05$ ). Median [minimum, maximum].

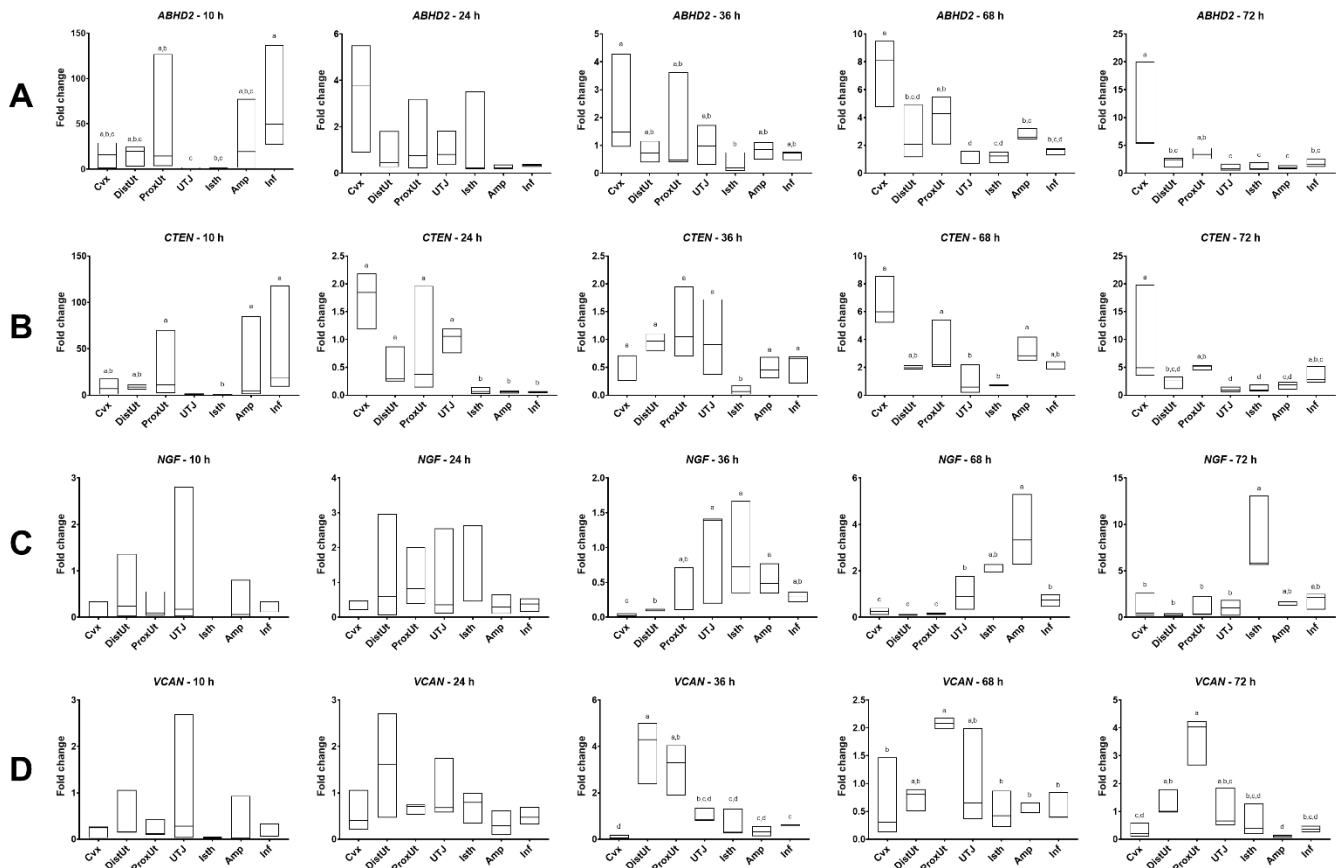

25 **Figure S4.** Changes in **A) ABHD2**, **B) CTEN**, **C) NGF**, and **D) VCAN** expression among different tissues  
 26 in the period 10–72 h. 10, 24, 36, 68, and 72 h post-natural mating. Tissue anatomical regions of the  
 27 rabbit female reproductive tract (endocervix, Cvx; distal uterus, DistUt; proximal uterus, ProxUt;  
 28 utero-tubal junction, UTJ; distal isthmus, Isth; ampulla, Amp; and infundibulum, Inf). Fold changes  
 29 relative to reference group (UTJ) are shown. Different letters (<sup>a,b,c,d</sup>) represent statistical differences  
 30 between tissues ( $p < 0.05$ ). Median [minimum, maximum].
